# Supplementary material for: Differences between soluble and insoluble undenatured type II collagen in improving osteoarthritis in rats and their potential mechanisms
Source: Royal Society of Chemistry journal article supplement (doi:10.1039/d3fo02954a), 2023-01-01
Supplement: d3fo02954a1.xlsx [file d3fo02954a1.xlsx]

## Sheet: joint width
	Control
Day 0	0.25	0.07	0.07	0.39	-0.19	0.14	0.2
Day 7	0.02	0.1	0.03	-0.15	-0.16	0.28	-0.31
Day 14	-0.02	-0.06	0.24	-0.13	0.03	0.3	-0.05
Day 28	-0.17	0.1	0.17	0.3	-0.07	0.2	0.07
	Model
Day 0	2.19	2.22	2.64	3.07	3.78	2.92	3.95	1.86
Day 7	1.6	3.08	2.61	2.23	2	1.97	1.97	1.12
Day 14	0.52	1.39	1.19	1.27	1.01	1.18	1.11	1.17
Day 28	1.36	0.85	0.97	0.73	0.8	1.15	1.1	1.29
	SC II
Day 0	2.29	3.02	4.14	2.61	4.49	1.14	3.48	1.9
Day 7	0.76	1.94	1.64	1.15	1.36	0.61	1.04	1.02
Day 14	0.57	1.42	0.55	1.26	0.41	1.03	0.79	0.96
Day 28	0.72	0.78	0.68	0.8	0.92	0.79	0.04	0.5
	IC II
Day 0	1.78	2.44	3.88	3	4.53	2.4	2.1	3.49
Day 7	1.04	0.71	1.12	1.25	0.89	1.9	1.47	0.9
Day 14	0.71	1.02	1.12	1.2	0.93	1.06	0.77	1
Day 28	0.77	0.87	0.79	1.22	0.33	0.76	0.61	0.52
	Celecoxib
Day 0	2.39	2.48	3.1	2.01	2.88	1.61	4.14	2.79
Day 7	0.04	1.12	0.92	1.14	0.8	1.25	1.16	0.95
Day 14	0.65	0.61	1.97	1.69	0.35	0.61	0.46	1.02
Day 28	0.63	0.98	0.92	0.84	0.72	0.76	1.03	0.85

## Sheet: right hind limb strength
	Control
Day 0	50.14	47.35	49.17	50.97	51.92	51.13	51.07
Day 7	49.6	48.92	48.93	49.44	50.26	49.86	49.38
Day 14	50.45	49.67	49.69	48.94	51.12	50.56	48.31
Day 28	50.54	50.15	49.18	50.44	49.22	50.49	51.6
	Model
Day 0	42.15	35.12	27.13	33.13	36.73	41.9	31.27	45.89
Day 7	43.01	33.69	39.51	37.81	32.72	41.52	30.82	40.48
Day 14	44.97	45.58	46.52	41.76	46.24	39.08	41.14	46.77
Day 28	47.15	44.76	49.72	43.84	48.73	47.54	47.12	50.46
	SC II
Day 0	39.23	44.03	24.21	39.25	24.15	39.6	24.73	38.49
Day 7	51.98	43.66	51.29	43.53	46.81	50.34	49.17	45.67
Day 14	48.82	46.98	47.69	51.21	46.51	51.31	50.39	49.47
Day 28	47.47	50.65	50.65	50.47	49.85	50	48.25	48
	IC II
Day 0	33.97	41.48	31.29	30.72	45.4	24.76	41.47	38.3
Day 7	45.11	48.6	48.03	49.71	42.44	45.4	32.4	48.58
Day 14	42.09	41.55	49.08	50.16	40.89	46.89	39.62	48.73
Day 28	46.99	48.01	47.02	45.1	48.86	50.42	46.26	46.56
	Celecoxib
Day 0	41.81	30.42	36.26	28.63	34.13	34.73	35.94	38.11
Day 7	47.65	47.97	44.38	45.82	48.3	45.91	40.06	44.91
Day 14	45.74	44.79	43.26	49.49	44.94	40.21	43.15	47.37
Day 28	47.02	48.61	42.86	49.73	44.28	43.09	49.45	48.38
