# Supplementary material for: Differences between soluble and insoluble undenatured type II collagen in improving osteoarthritis in rats and their potential mechanisms
Source: Royal Society of Chemistry journal article supplement (doi:10.1039/d3fo02954a), 2023-01-01
Supplement: d3fo02954a3.xlsx [file d3fo02954a3.xlsx]

## Sheet: Treg
Control	13.5	13.52	13.39	11.29	11.3	10.98
Model	4.25	4.13	4.22	3.69	3.31	3.64
SC II	10.1	9.26	9.04	6.27	6.2	6.15
IC II	8.98	9.67	9.11	6.68	6.72	6.56
Celecoxib	7.03	7.41	7.91	5.1	5.17	5.08
