# Supplementary material for: Differences between soluble and insoluble undenatured type II collagen in improving osteoarthritis in rats and their potential mechanisms
Source: Royal Society of Chemistry journal article supplement (doi:10.1039/d3fo02954a), 2023-01-01
Supplement: d3fo02954a5.xlsx [file d3fo02954a5.xlsx]

## Sheet: pH value
	Control			SC II			IC II
	Gastric	Small intestine		Gastric	Small intestine		Gastric	Small intestine
30 min	4.47	6.53		5.27	6.56		2.39	6.59
30 min	4.33	6.21		4.19	6.48		3.41	6.7
30 min	4.48	6.24		3.47	6.73		3.72	6.87
60 min	4.32	5.86		3.9	6.81		2.8	6.69
60 min	4.21	6.36		3.6	7.7		3.74	6.69
60 min	4.24	6.22		5.11	6.58		3.78	6.98
120 min	4.22	6.5		4.3	7.44		2.61	6.61
120 min	4.17	6		2.9	6.95		3.23	6.62
120 min	4.19	6.22		4.63	6.75		4	7.35
240 min	3.4	6.16		2.63	7.23		2.88	7.76
240 min	3.86	6.39		4.08	6.63		3.66	6.66
240 min	4.22	6.41		3.32	7.59		3.37	6.98
