# Supplementary material for: Differences between soluble and insoluble undenatured type II collagen in improving osteoarthritis in rats and their potential mechanisms
Source: Royal Society of Chemistry journal article supplement (doi:10.1039/d3fo02954a), 2023-01-01
Supplement: d3fo02954a7.pdf [file d3fo02954a7.pdf]

## Supplementary materials

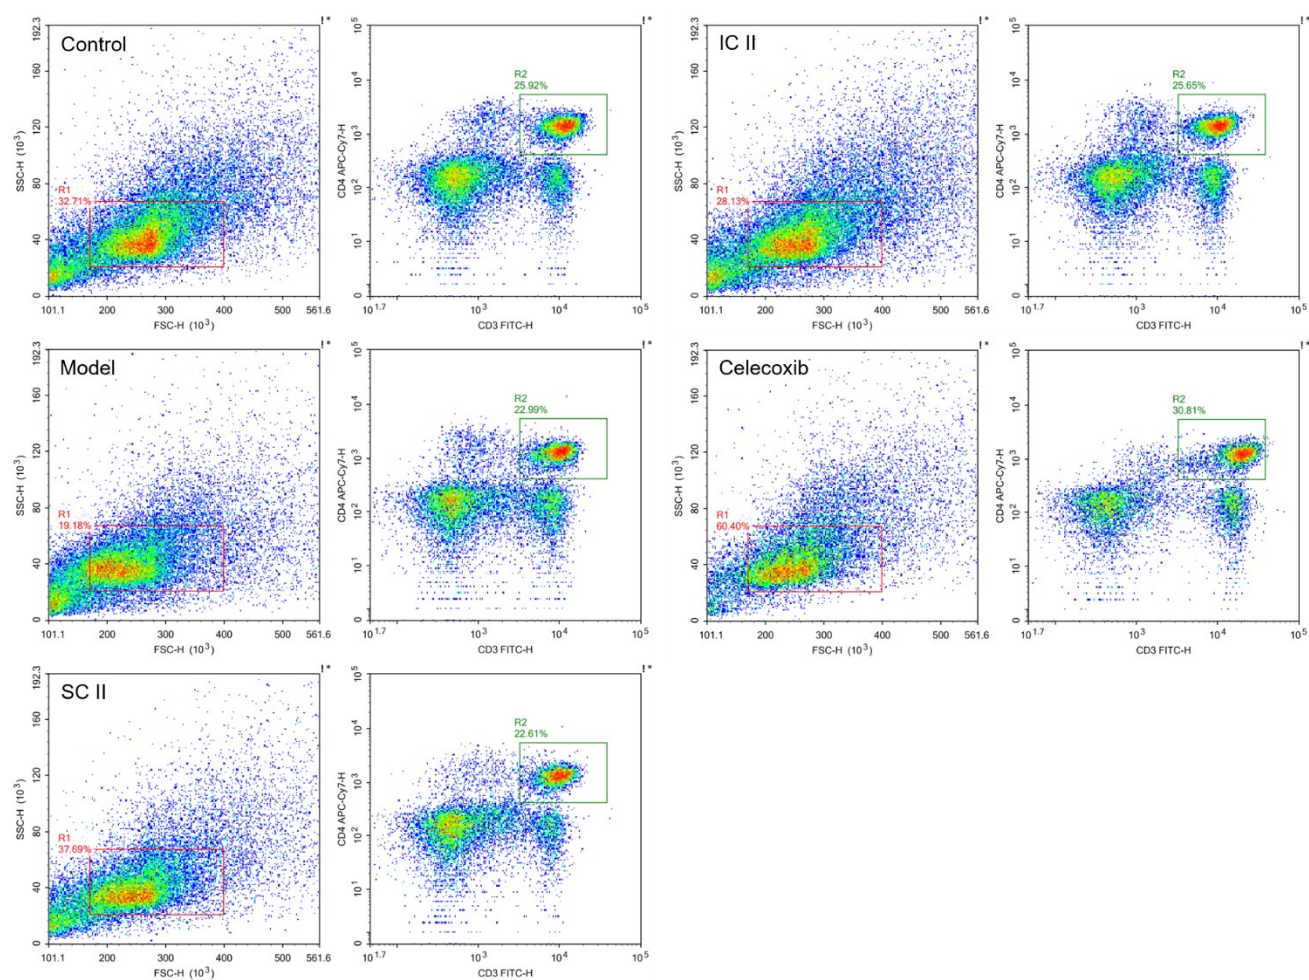

Figure S1. Flow cytometer gate diagram

A

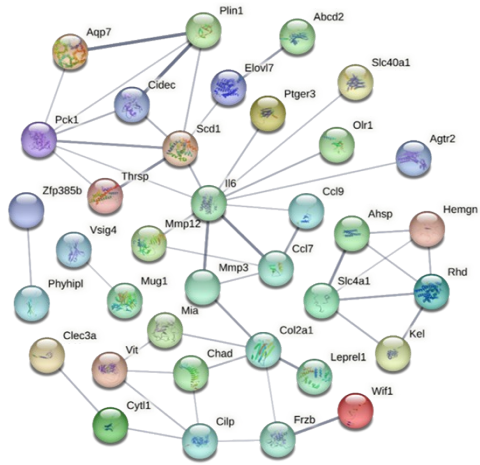

B

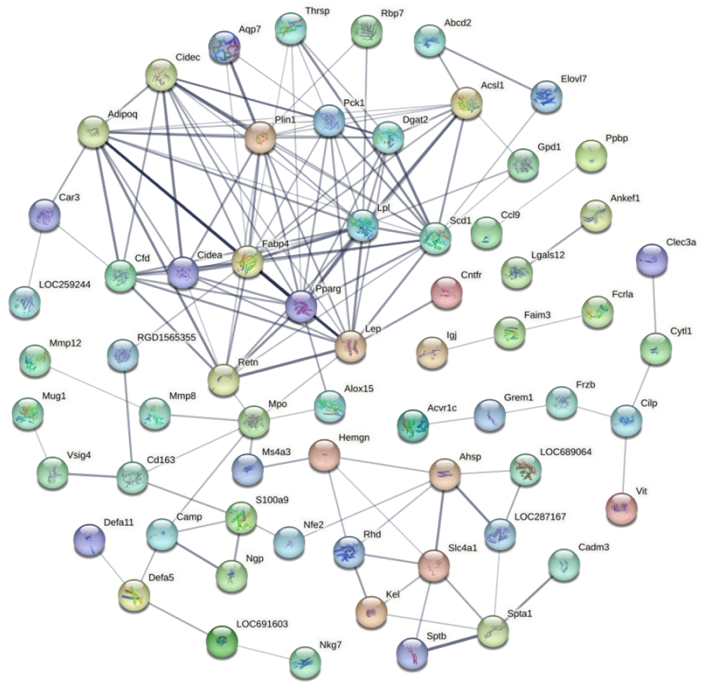

**Figure S2.** PPI Network Construction (A) Day 14 and (B) Day 28.

**Table S1.** Primers used in qPCR experiments

| Gene name      | Forward sequence (5'-3') | Reverse sequence (5'-3') |
|----------------|--------------------------|--------------------------|
| GAPDH          | GGCACAGTCAAGGCTGAGAATG   | ATGGTGGTGAAGACGCCAGTA    |
| TGF- $\beta$ 1 | GACCGCAACAACGCAATCTATGA  | CTGGCACTGCTTTCCCGAATGTC  |
| C              |                          |                          |
| IL-10          | CCACTTCCCAGTCAGCCAG      | TGGCAACCCAAGTAACCCTTA    |
| Foxp3          | AAAGTGGCAGGGAAGGAGTG     | TGTCTGAGGCAGGCTGGATA     |
| CD11b          | TGCCGCGAAGATCCTAGTTG     | GGCGTTTCCCACCCCAATAA     |
| Pck1           | TATTCACATCTGCGACGGCT     | GTGAGAGCCAGCCAACAGT      |
| Scd1           | ACCCAGCTACCAGGATGAG      | GGTAGTAAAATATCCCCAGAGC   |
| Col2a1         | GATGTATGGAAGCCCTCGTCC    | CCTTTGGCCCTAATTTTCCACT   |
| Ccl7           | CCGAGTCTGCCAACTTTCAC     | TGAATTGGTCCCATCTGGTTG    |
| Clip           | GTCCTGATGGCAAACCGTC      | AATGTATGGGGTCTCTGCCCT    |
| Frzb           | GCCCTCCCCTCAGTGTTAATG    | TCATATCCCAGCGCTTGACTT    |
| Fabp4          | ATGAAAGAAGTGGGAGTTGGC    | TCTCTGACCGGATGACGACC     |
| Lpl            | ACATTCCCTTCACCCTGCCG     | CCGGCTTTCACTCGGATCTT     |
| Adipoq         | GTCCCTCCACCCAAGGAAAC     | GACCAAGAACACCTGCGTCT     |
| Pparg          | AAGGGACTCGAGGAGGTCAA     | CTGTGTCAACCATGGTAATTCAG  |
| T              |                          |                          |
| Lep            | GACCCAGCGAGGAAAATGT      | GGATACCGACTGCGTGTGT      |
| NF- $\kappa$ B | ACAATAACCCCTTTCAAGTTCCC  | AATCGGATGCGAGAGGACAG     |
| PPAR $\alpha$  | CCTCTGGTTGTCCCCTTGAG     | CTTCAGTCTTGGCTCGCCTC     |
| P38            | GCACTACAACCAGACAGTGGATA  | CTCATGGCTTGGCATCCTGT     |
| AKT            | TGAGACCGACACCAGGTATTTTG  | GCTGAGTAGGAGAACTGGGGAAA  |
| PI3K           | GGTGAGGAACGAAGAATGGC     | TCCGAGGCAAGACAGGGATA     |
| AMPK $\alpha$  | ACCTGAGAACGTCCTGCTTG     | GGCCTGCGTACAATCTTCCT     |
